# Supplementary material
Source: publisher figshare collection journal article supplement (https://sage.figshare.com/ndownloader/files/15254285)
Supplement: Supplementary file 1 [file 15254285]

## Supplementary Figure 1 Figures of EMM lesions

Here's an example(The gums neoplasm ), Please refer to the attached "image" to see other images.

1a

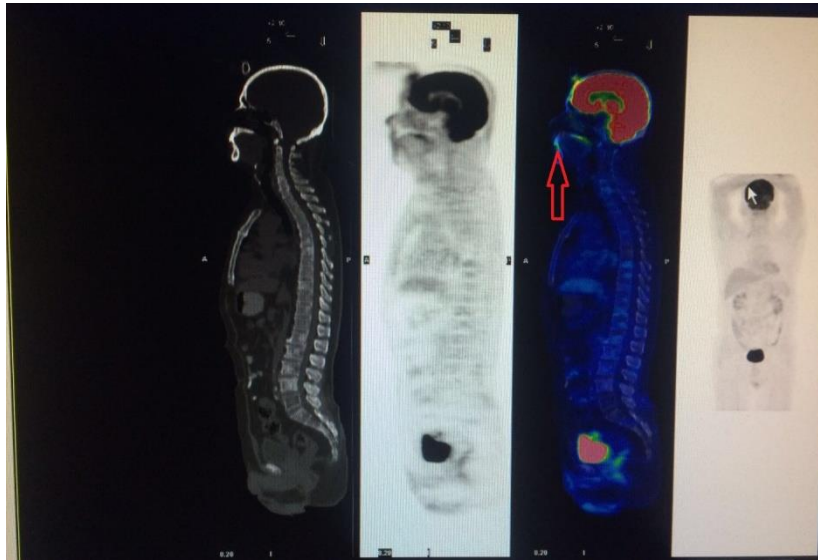

1b

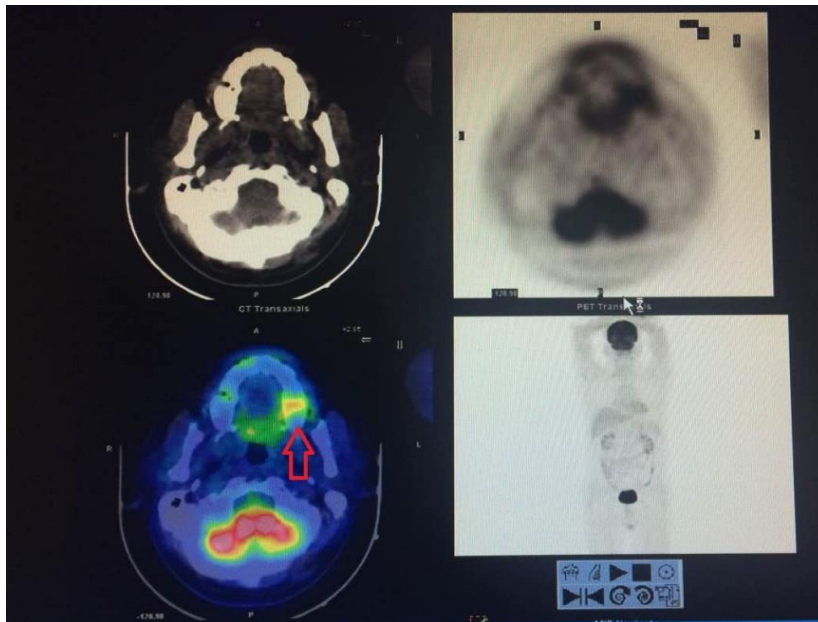

## Supplementary Figure 2 Images of staining with Ki67.

Here were some images of staining with Ki67 in extramedullary tissue.

1 .20-30%

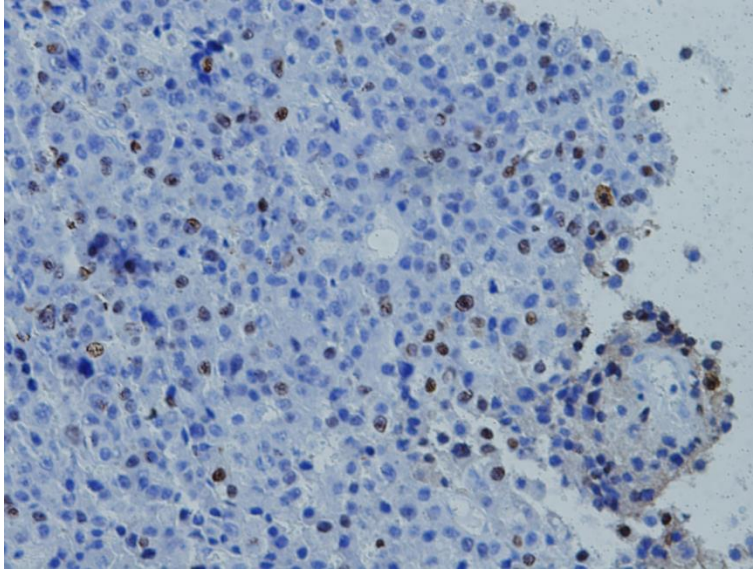

2.5-10%

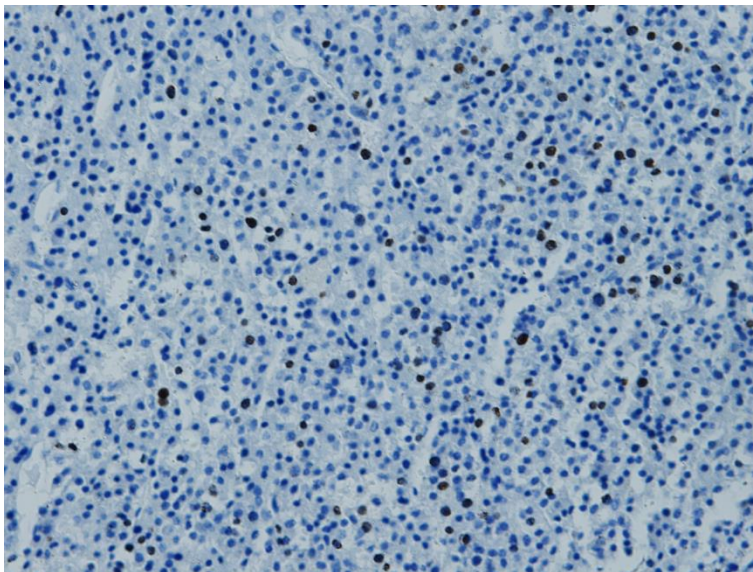

3.1-5%

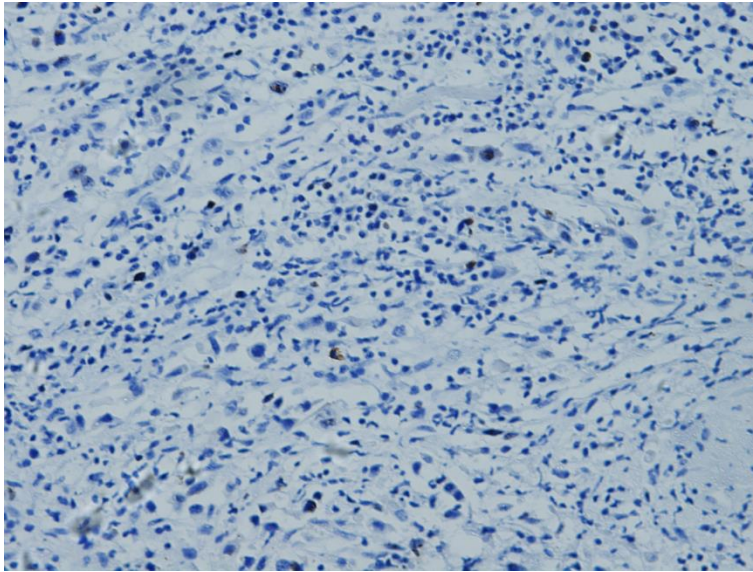

4.60-70%

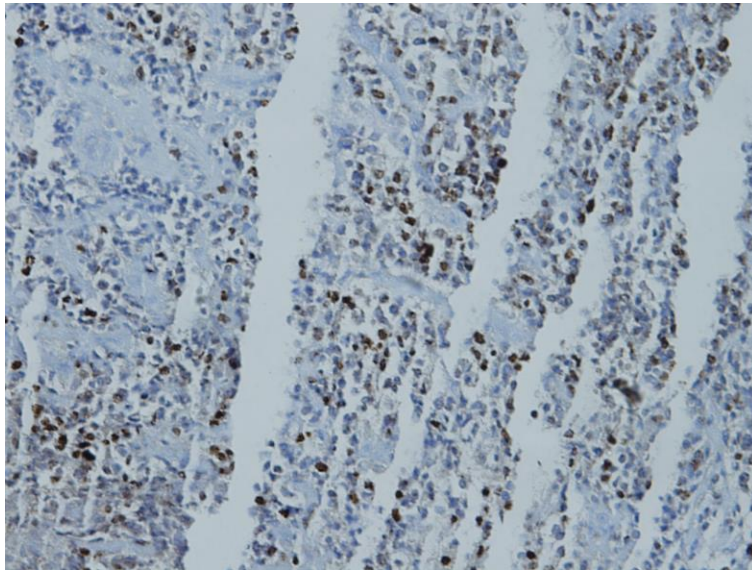

Supplementary Table 1 The exact number of EMM lesions found in total and per patient.

| Patients | EMM lesions             | EMM lesions number |
|----------|-------------------------|--------------------|
| NO.1     | left neck               | 1                  |
| NO.2     | beside of the sacrum    | 1                  |
| NO.3     | beside the thoracic     | 1                  |
| NO.4     | beside the ribs         | 1                  |
| NO.5     | chest, right neck       | 2                  |
| NO.6     | beside the ribs         | 1                  |
| NO.7     | chest                   | 1                  |
| NO.8     | beside the ribs         | 1                  |
| NO.9     | gum                     | 1                  |
| NO.10    | beside the lumbar spine | 1                  |
| NO.11    | beside the lumbar spine | 1                  |
| NO.12    | Lung                    | 1                  |
| NO.13    | Kidney                  | 1                  |
| NO.14    | beside of the sacrum    | 1                  |
| NO.15    | beside the lumbar spine | 1                  |
| NO.16    | liver                   | 1                  |
| NO.17    | Under the right jaw     | 1                  |
| NO.18    | beside the ribs         | 1                  |
| NO.19    | beside the thoracic     | 1                  |
| NO.20    | beside the lumbar spine | 1                  |
